# Supplementary material
Source: PubMed Central journal article supplement (PMC7116172)
Supplement: EMS94961-supplement-SuppGuide.pdf [file EMS94961-supplement-SuppGuide.pdf]

Supplementary Information Guide

**Supplementary Table 1.** Table presenting the primers used for qRT-PCR.
